# Supplementary material
Source: PubMed Central journal article supplement (PMC3358826)

### **Supplemental Figure S1**

Blasts from patients with AML (upper panels) and ALL (middle panels), as well as normal cord blood (CB) CD34<sup>+</sup> cells (lower panels) were exposed (24 hr) to belinostat (AML: 300 nM; B-cell ALL, 200 nM; T-cells ALL, 300 nM; CB CD34<sup>+</sup>, 500 nM)  $\pm$  5 nM bortezomib, after which cytospin preparations were stained with Wright-Giemsa and viewed at 40x magnification.

### **Supplemental Figure S2**

Primary blasts were obtained from a patient with T-cell ALL and exposed (24 hr) to the indicated concentrations of belinostat  $\pm$  5 nM bortezomib, after which cells were analyzed for uptake of 7-AAD/DiOC<sub>6</sub> by flow cytometry. Numbers refer to the percentage of cells displaying low DiOC<sub>6</sub> uptake (left quadrants) and high 7-AAD uptake (upper quadrants). Duplicate determinations yielded equivalent results.

### **Supplemental Figure S3**

Blasts from an additional patient with AML (#2) were exposed (24 hr) to the indicated concentrations of belinostat  $\pm$  5 nM bortezomib, after which cells were lysed and Western blot analysis performed to monitor expression of acetylated  $\alpha$ -tubulin (A), acetylated RelA/p65 (K310), phosphorylated I $\kappa$ B $\alpha$  (S32/36), and p100/p52 (B), as well as XIAP and Bcl-xL (C). Each lane was loaded with 30  $\mu$ g of protein; blots were subsequently stripped and re-probed for expression of  $\beta$ -actin to ensure equivalent loading and transfer. Duplicate experiments yielded equivalent results.

# Supplemental Figure S1

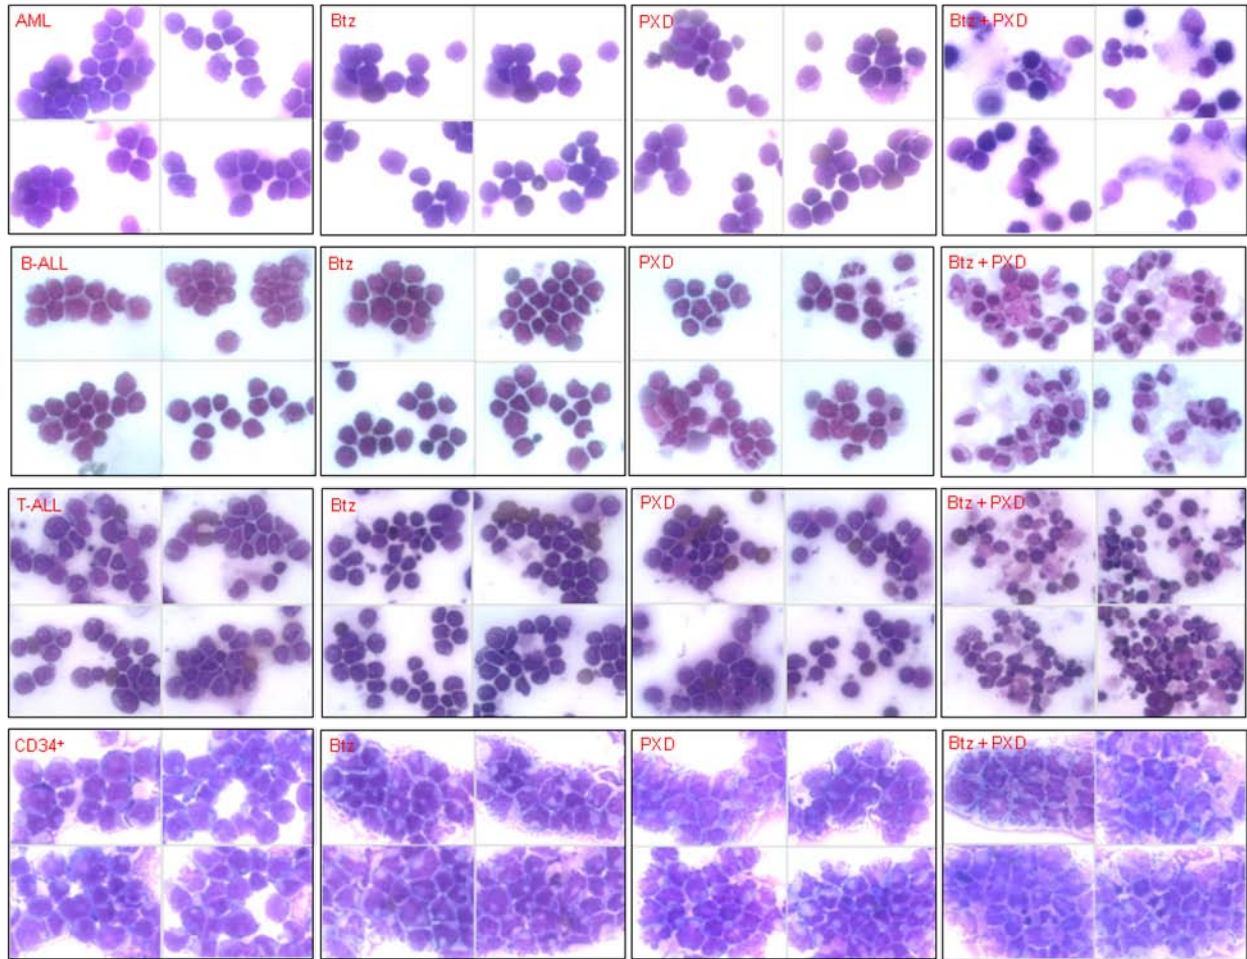

## Supplemental Figure S2

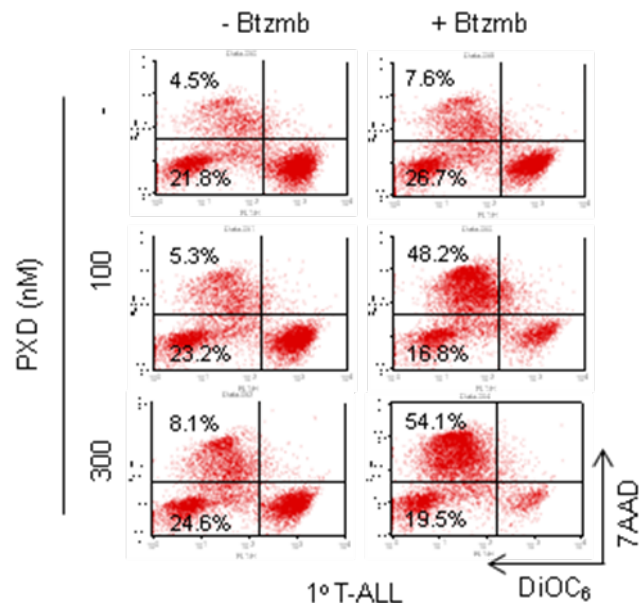

## Supplemental Figure S3

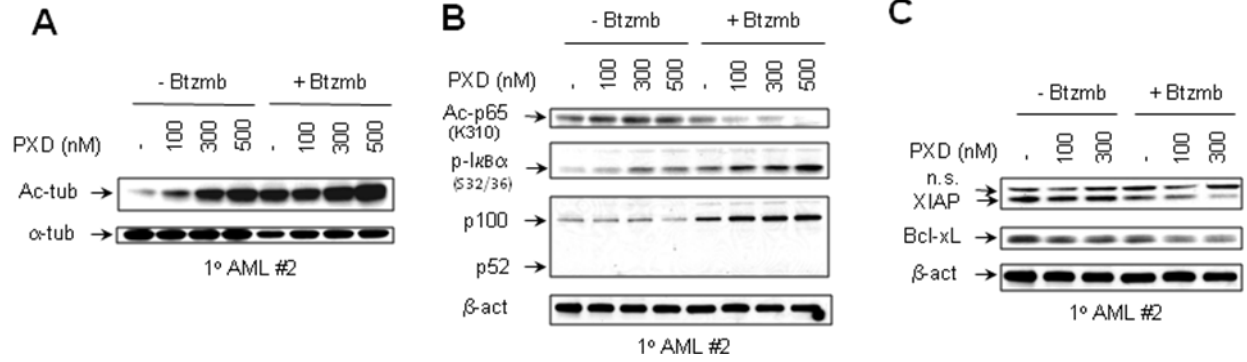

Supplement: NIHMS376610-supplement-supplement_1.pdf [file NIHMS376610-supplement-supplement_1.pdf]
